# Supplementary material
Source: publisher site journal article supplement (https://www.dovepress.com/article/468419)
Supplement: Supplementary file 1 [file get_supplementary_file.php]

**Supplementary Table 1. Drug resistance rate of *H. influenzae* from 2017 to 2021.**

| Antibiotics | Drug resistance rate of *H. influenzae* from 2017 to 2021(%) | | | | |
| --- | --- | --- | --- | --- | --- |
| 2017 | 2018 | 2019 | 2020 | 2021 |
| Ampicillin | 51.8 | 63.1 | 77.8 | 88.4 | 81.9 |
| Azithromycin | 39.8 | 39.7 | 48.8 | NT | 59.4 |
| Cefuroxime | 13 | 25.5 | 79.6 | 39.8 | 31.9 |
| Cefotaxime | NT | NT | 0.6 | 0 | 0.2 |
| Cefaclor | NT | NT | 40.1 | 39.6 | 5.9 |
| Rifampin | NT | NT | 0 | 0.4 | 0.2 |
| Ofloxacin | NT | NT | 1 | 0.4 | 0 |
| Trimethoprim-sulfamethoxazole | 61.6 | 70.3 | 74 | 69.8 | 83.6 |
| Chloramphenicol | 0.1 | 0.2 | 0 | 2.1 | 0 |
| Tetracycline | NT | NT | 0 | 0 | 0 |

NT, not tested.

**Supplementary Table 2. Drug resistance rate of *S. pneumoniae* from 2017 to 2021.**

| Antibiotics | Infection site | Drug resistance rate of *S. pneumoniae* from 2017 to 2021(%) | | | | |
| --- | --- | --- | --- | --- | --- | --- |
| 2017 | 2018 | 2019 | 2020 | 2021 |
| Penicillin G | others | 10.4 | 5.6 | 1.7 | 0 | 1.1 |
| Penicillin G | Meningitis | 83.1 | 90.6 | 90.9 | 90 | 93.7 |
| Penicillin G | oral | 76.3 | 60.4 | 18.5 | 13.2 | 18.3 |
| Amoxicillin | others | 20 | 15.4 | 0 | 0 | 0 |
| Cefotaxime | others | 21.9 | 21.3 | 16.9 | 11.8 | 17.8 |
| Cefotaxime | Meningitis | 39.4 | 32.4 | 26.3 | 21.8 | 27.1 |
| Meropenem |  | 59.5 | 31.3 | 17.7 | 10.2 | 12.7 |
| Levofloxacin |  | 0.6 | 2 | 0.4 | 0.3 | 0 |
| Moxifloxacin |  | 0.8 | 1.4 | 0.1 | 0 | 0 |
| Trimethoprim-sulfamethoxazole |  | 63.6 | 65.4 | 65.2 | 63.2 | 60.9 |
| Erythromycin |  | 98.5 | 99.3 | 99 | 99.2 | 99.4 |
| Linazolam |  | 0 | 0 | 0 | 0 | 0 |
| Vancomycin |  | 0 | 0 | 0 | 0 | 0 |
| Chloramphenicol |  | 7.1 | 9 | 5.2 | 7.1 | 7.9 |
| Tetracycline |  | 92.3 | 91.7 | 93.2 | 86.8 | 90.5 |

**Supplementary Table 3. Drug resistance rate of *S. aureus* from 2017 to 2021.**

| Antibiotics | Drug resistance rate of *s. aureus* from 2017 to 2021(%) | | | | |
| --- | --- | --- | --- | --- | --- |
| 2017 | 2018 | 2019 | 2020 | 2021 |
| Penicillin G | 97.1 | 96.2 | 95.2 | 95.5 | 95.3 |
| Oxacillin | 30.3 | 34.3 | 33.1 | 31 | 38.4 |
| Gentamicin | 7.2 | 3.9 | 3.1 | 3.4 | 4.5 |
| Rifampin | 1.4 | 0.8 | 0.1 | 0.2 | 0.6 |
| Ciprofloxacin | 3.8 | 3.3 | 5.2 | 3.9 | 4.1 |
| Cefoxitin | 76 | 37.4 | 28.8 | 31.5 | 41.2 |
| Moxifloxacin | 2.9 | 3.2 | 3.3 | 2.9 | 3.9 |
| Trimethoprim-sulfamethoxazole | 9.7 | 6.8 | 6.7 | 6.1 | 6.5 |
| Clindamycin | 29.1 | 31.7 | 23.6 | 19.5 | 21.6 |
| Erythromycin | 55.1 | 62.7 | 59.2 | 57.2 | 54.2 |
| Nitrofurantoin | 0 | 0 | 0 | 0 | 0 |
| Linazolam | 0 | 0 | 0 | 0 | 0 |
| Vancomycin | 0 | 0.1 | 0 | 0 | 0 |
| Quinupristin/Dalfopristin | 0.1 | 0.4 | 0 | 0 | 0.2 |
| Tetracycline | 9.5 | 14.2 | 14.8 | 10.7 | 10.9 |

**Supplementary Table 4. Drug resistance rate of *E. coli* from 2017 to 2021.**

| Antibiotics | Drug resistance rate of *E. coil* from 2017 to 2021(%) | | | | |
| --- | --- | --- | --- | --- | --- |
|  | 2017 | 2018 | 2019 | 2020 | 2021 |
| Ampicillin | 84.4 | 81.9 | 79.7 | 91.6 | 84.3 |
| Ampicillin-sulbactam | 18.1 | 24.9 | 78.6 | 47.1 | 32.3 |
| Piperacillin-tazobactam | 3 | 2.6 | 5.9 | 3.8 | 3.8 |
| Cefazolin | 96.7 | 96.1 | 92 | 66.9 | 50.5 |
| Ceftazidime | 14.4 | 15.1 | 21.2 | 19.3 | 18.3 |
| Ceftriaxone | 42.1 | 43.2 | 40.1 | 38.9 | 50 |
| Cefepime | 35.3 | 18 | 18.6 | 18.4 | 19.2 |
| Cefotetan | 0.2 | 0.3 | 0.1 | 0 | 0.8 |
| Aztreonam | 25.7 | 23.7 | 30.2 | 28 | 23.5 |
| Meropenem | 2.6 | 1.5 | 2.3 | 2.2 | 2.2 |
| Imipenem | 2.2 | 1.8 | 3 | 2.6 | 2.6 |
| Amikacin | 1.3 | 1.4 | 1.5 | 0 | 1.6 |
| Gentamicin | 34.4 | 34.3 | 28.4 | 30.3 | 29.3 |
| Tobramycin | 3.2 | 3.4 | 3.6 | 3.6 | 3.2 |
| Ciprofloxacin | 33 | 38.4 | 44.4 | 48 | 43.2 |
| Levofloxacin | 27.6 | 26.7 | 29.8 | 31.9 | 31.6 |
| Trimethoprim-sulfamethoxazole | 53.6 | 48.9 | 54.3 | 51.6 | 54.6 |
| Nitrofurantoin | 8.2 | 1.3 | 2.3 | 0.6 | 1.3 |

**Supplementary Table 5. Drug resistance rate of *K. pneumoniae* from 2017 to 2021.**

| Antibiotics | Drug resistance rate of *K. pneumoniae* from 2017 to 2021(%) | | | | |
| --- | --- | --- | --- | --- | --- |
| 2017 | 2018 | 2019 | 2020 | 2021 |
| Ampicillin | 92 | 83.5 | 88.4 | 92.7 | 95.1 |
| Ampicillin-sulbactam | 55.2 | 44 | 75 | 56.4 | 40 |
| Piperacillin-tazobactam | 38.9 | 25.9 | 6.2 | 22.7 | 15.8 |
| Cefazolin | 99.2 | 99.1 | 93.9 | 57.1 | 40.9 |
| Ceftazidime | 50.5 | 21.6 | 18.9 | 40.9 | 30.5 |
| Cefepime | 53.1 | 18.1 | 19.8 | 35.8 | 27 |
| Aztreonam | 50.3 | 21.7 | 28.2 | 45.1 | 27.6 |
| Meropenem | 35.5 | 12.3 | 6 | 21.8 | 10.4 |
| Imipenem | 37.8 | 14.1 | 8 | 22.7 | 11.5 |
| Amikacin | 29.3 | 8.9 | 3.3 | 17.6 | 1.1 |
| Gentamicin | 39.7 | 19 | 14 | 11.9 | 9.1 |
| Ciprofloxacin | 50.8 | 29.7 | 32.6 | 37.7 | 14.4 |
| Levofloxacin | 36.8 | 16.4 | 11.3 | 20.5 | 6.9 |
| Trimethoprim-sulfamethoxazole | 24.1 | 27.8 | 34.4 | 44.9 | 25.9 |
| Nitrofurantoin | 58.1 | 17 | 33.7 | 48.2 | 59.1 |

**Supplementary Table 6. Drug resistance rate of *M. catarrhalis* from 2017 to 2021.**

| Antibiotics | Drug resistance rate of *M. catarrhalis* from 2017 to 2021(%) | | | | |
| --- | --- | --- | --- | --- | --- |
| 2017 | 2018 | 2019 | 2020 | 2021 |
| Azithromycin | 52.5 | 30.7 | 28.4 | NT | 22.8 |
| Amoxicillin-clavulanic acid | 50.8 | 0 | 9.1 | 0.5 | NT |
| Cefotaxime | NT | NT | 0 | 0 | 0 |
| Cefaclor | NT | NT | 3.5 | 0 | 0 |
| Rifampin | NT | NT | 0 | 0.5 | 0 |
| Trimethoprim-sulfamethoxazole | 19.7 | 16.6 | 46.5 | 11.3 | 1.4 |
| Chloramphenicol | NT | NT | 0.2 | 0.5 | 0.2 |
| Tetracycline | 3.3 | 3.6 | 4.1 | 0.5 | 0.2 |

NT, not tested.

**Supplementary Figure 1. *S.pneumoniae* and *K.pneumoniae* detection numbers were positively correlated with PM2.5.**





**Supplementary Figure 2. *H.influenzae* and *E.coli* detection numbers were positively correlated with PM10.**





**Supplementary Figure 3. *S.aureus* and *M.catarrhalis* detection numbers were positively correlated with NO2.**





**Supplementary Figure 4. *E.coli* detection numbers were negatively correlated with O3.**





**Supplementary Figure 5. *E.coli* and *K.pneumoniae* detection numbers were positively correlated with the average temperature.**
